# Supplementary material for: Riboflavin secreted by Shewanella sp. FDL-2 facilitates its reduction of Se(iv) and Te(iv) by promoting electron transfer
Source: Royal Society of Chemistry journal article supplement (doi:10.1039/d3ra07093j), 2023-01-01

## Supplementary Information to

### “Riboflavin secreted by *Shewanella sp.* FDL-2 facilitates its reduction of Se(IV) and Te(IV) by promoting electron transfer”

**Manman Cheng**<sup>1,2</sup>, **Haikun Zhang**<sup>3</sup>, **Yan Li**<sup>1,2\*</sup>, **Wenhao Chen**<sup>1\*</sup>

<sup>1</sup> Solid-state Fermentation Resource Utilization Key Laboratory of Sichuan Province, Yibin University, Yibin City, Sichuan Province 644000, China

<sup>2</sup> College of life sciences, Yantai university, Yantai 264000, China

<sup>3</sup> Yantai Institute of Coastal Zone Research, Chinese Academy of Sciences, Yantai 264000, China

\* Correspondence: [liyan0709@hotmail.com](mailto:liyan0709@hotmail.com); [84460462@qq.com](mailto:84460462@qq.com)

This file consists of four pages, containing one table (Table S1) and two Figures (Figures S1 and S2 ).

**Table S1** Primers of selected genes for RT–qPCR assays.

| <b>Primer name</b>            | <b>Primer sequence (5'-3')</b> |
|-------------------------------|--------------------------------|
| FDL-2_00165 forward primer    | CACTCCGGAGGAACACCAAA           |
| FDL-2_00165 reverse primer    | CTCGTCGATAAAGGCAGTCCG          |
| FDL-2_02437 forward primer    | TACGCGGTAACGGTGCTATC           |
| FDL-2_02437 reverse primer    | TCATCGAACACCGGAAGGC            |
| FDL-2_01864 forward primer    | TCTGCTGATGTGTGACAGCC           |
| FDL-2_01864 reverse primer    | GCCGCTTATGCCTGAGACAA           |
| FDL-2_01688 forward primer    | TATTCCGTAGCGGTGATGCC           |
| FDL-2_01688 reverse primer    | GTTGGCTGCGTAAGCAGAAG           |
| FDL-2_04257 forward primer    | CCAAGAAGGTGAGGCCGTTT           |
| FDL-2_04257 reverse primer    | GGAGGCATAGCGTTCAAACC           |
| FDL-2_02760 forward primer    | GCATGTATCTGGATGCGGTG           |
| FDL-2_02760 reverse primer    | AACCACTGGCGTTGATCTCG           |
| FDL-2_01463 forward primer    | CACAGGCGATACCGGACAAG           |
| FDL-2_01463 reverse primer    | AGCAGCAACAGGTAGAGTCC           |
| FDL-2_00533 forward primer    | TGAGTTGGTGGCCTTGTCTG           |
| FDL-2_00533 reverse primer    | AGTTCAGGCACTTCGCCTTT           |
| FDL-2_01215 forward primer    | TATCGGTTGCCACGAGATGG           |
| FDL-2_01215 reverse primer    | ATTGATGGTGCCGAACACCT           |
| FDL-2_01396 forward primer    | CGATCAACTTCATGGCTCGC           |
| FDL-2_01396 reverse primer    | AACTATGTCCGACGGCTTGG           |
| FDL-2_01436 forward primer    | TTCTGGTCAATACCGCCAGC           |
| FDL-2_01436 reverse primer    | ACATAGGTCGACCGACTCCT           |
| FDL-2_01397 forward primer    | TTCCGCCTTACCATAGTGCC           |
| FDL-2_01397 reverse primer    | AGATTGACCTTATCGCCGGG           |
| FDL-2_01902 forward primer    | ATCGAAGCACTGGCACGTAA           |
| FDL-2_01902 reverse primer    | CATACGCACGACTATCGCCT           |
| FDL-2_04281 forward primer    | GGTATTGCTCGGAGGCATCA           |
| FDL-2_04281 reverse primer    | CAGCGACTCCGACTACCATC           |
| FDL-2_01903 forward primer    | GCCGAAGTGATAGTCAGCCA           |
| FDL-2_01903 reverse primer    | TGCGCTCAATCAGAGCATCA           |
| Reference gene forward primer | GAAGTCGGAATCGCTAGT             |
| Reference gene reverse primer | TAAGCTATCTACTTCTGG             |

**Fig. S1** Effects of medium volume (a), carbon sources (b), pH (c) and salinity (d) on the growth of strain FDL-2.

**Fig. S2** Color changes in 1 mM (a) Se(IV)- and (b) Te(IV)-supplemented systems in the presence of different concentrations of riboflavin (0, 0.2, 0.4, 0.6 mM, respectively).

**Fig. S1**

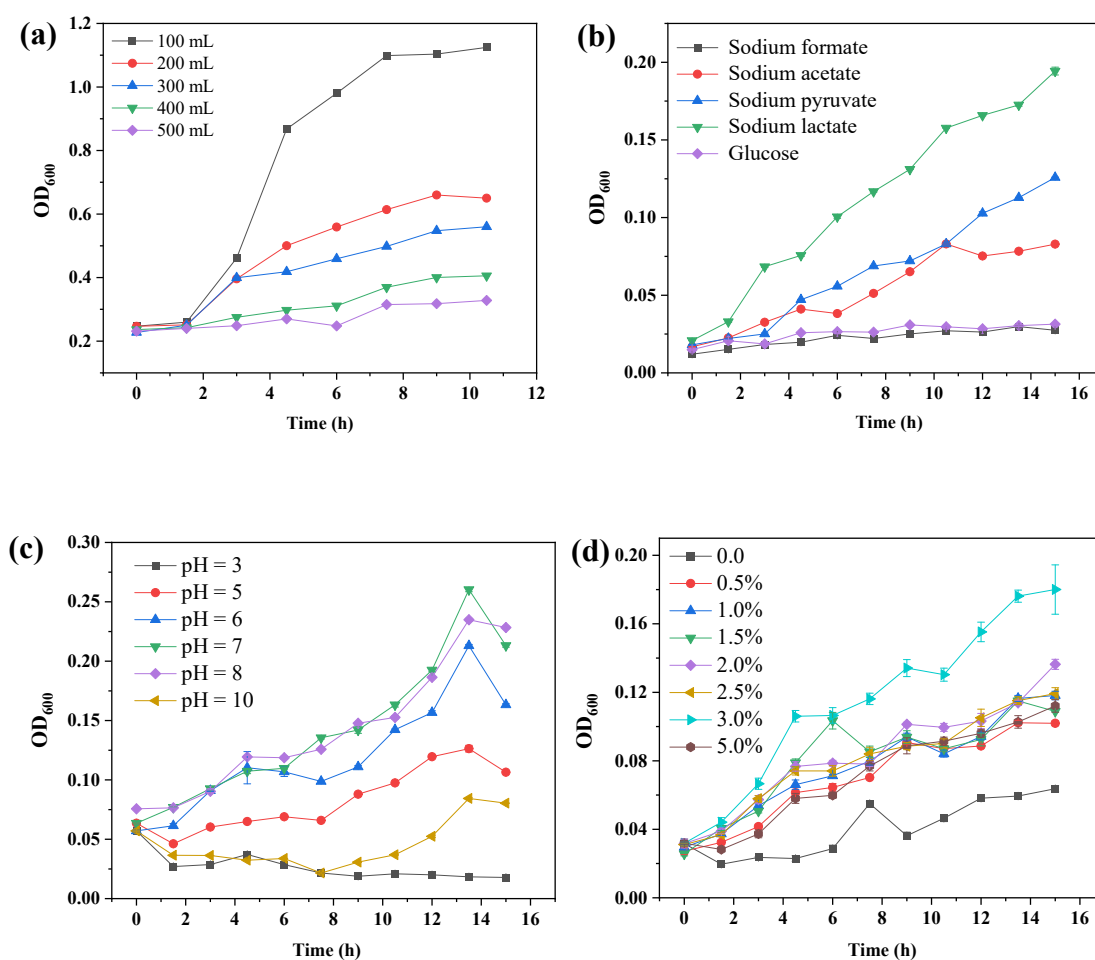

**Fig. S2**

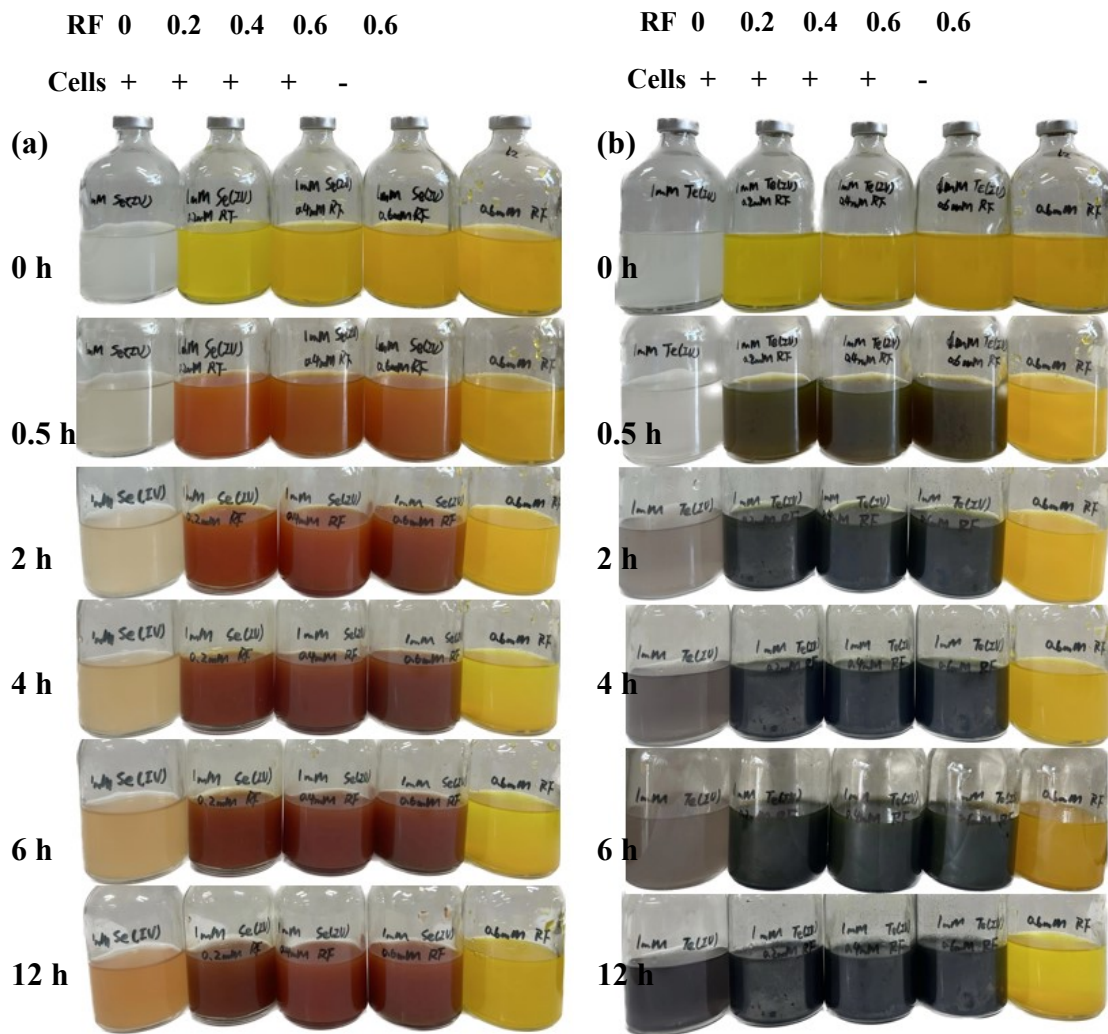

Supplement: d3ra07093j1.pdf [file d3ra07093j1.pdf]
